# Supplementary material
Source: ML conference proceedings conference paper supplement (https://openreview.net/forum?id=6XdUI9Cibc)
Supplement: supplementary_material [file opt_problem_learning.xlsx]

## Sheet: Nonlinear
Nonconvex, nonlinear constraints		N^ Equalities
		10	30	50	70	150
Variables		100	100	100	100	200
Optimizer (IPOPT)	Obj.Value (test set)	-26.27(0.00)	-21.81(0.00)	-18.05(0.00)	-11.69(0.00)	-29.45(0.00)
	Max Eq.	0.00(0.00)	0.00(0.00)	0.00(0.00)	0.00(0.00)	0.00(0.00)
	Avg. Eq.	0.00(0.00)	0.00(0.00)	0.00(0.00)	0.00(0.00)	0.00(0.00)
	Inference Time [s]	0.094(0.032)	0.244(0.132)	0.268(0.125)	0.401(0.167)	3.40(1.40)
	Training Time [s]	-	-	-	-	-
	Epochs	-	-	-	-	-
	Folder experiment	-	-	-	-	-
ENFORCE (λ_d=0.5)	Obj.Value (test set)	-26.37(0.00)	-21.48(0.01)	-16.68(0.01)	-7.75(0.03)	-27.77(0.02)
	Max Eq.	0.00(0.00)	0.00(0.00)	0.00(0.00)	0.00(0.00)	0.00(0.00)
	Avg. Eq.	0.00(0.00)	0.00(0.00)	0.00(0.00)	0.00(0.00)	0.00(0.00)
	Inference Time [s]	0.013(0.002)	0.023(0.002)	0.030(0.005)	0.049(0.009)	0.14(0.08)
	Training Time [s]	1520.24(5.16)	1764.19(8.03)	2145.42(24.11)	2939.42(56.46)	4161.28(1386.70)
	Epochs	1000	1000	1000	1000	1000
	Folder experiment	\ENFORCE\training_output\10\function_custom\nonlinear\run_20250509_083712	training_output\30\function_custom\nonlinear\run_20250509_144506	\ENFORCE\training_output\50\function_custom\nonlinear\run_20250508_142637	\ENFORCE\training_output\70\function_custom\nonlinear\run_20250509_200132	\ENFORCE\training_output\150\function_custom\nonlinear\run_20250511_230503
DC3 (λ_c=5)	Obj.Value (test set)	Implementation of the method is not available
	Max Eq.
	Avg. Eq.
	Inference Time [s]
	Training Time [s]
	Epochs
	Folder experiment
MLP (λ_c=0)	Obj.Value (test set)	-27.43(0.00)	-27.43(0.00)	-27.43(0.00)	-27.43(0.00)	-53.07(0.00)
	Max Eq.	214.95(0.10)	317.76(0.06)	317.14(0.01)	317.97(0.73)	497.38(4.64)
	Avg. Eq.	59.49(0.03)	72.10(0.01)	69.63(0.00)	70.57(0.01)	118.39(0.07)
	Inference Time [s]	0.001(0.001)	0.001(0.001)	0.001(0.001)	0.001(0.001)	0.002(0.001)
	Training Time [s]	428.75(17.41)	469.98(1.34)	606.19(183.13)	565.25(20.02)	633.66(19.47
	Epochs	1000	1000	1000	1000	1000
	Folder experiment	\ENFORCE\training_output\10\function_custom\nonlinear\run_20250509_110744	\ENFORCE\training_output\30\function_custom\nonlinear\run_20250509_172944	\ENFORCE\training_output\50\function_custom\nonlinear\run_20250508_184554	\ENFORCE\training_output\70\function_custom\nonlinear\run_20250510_091650	\ENFORCE\training_output\150\function_custom\nonlinear\run_20250512_084817
MLP + soft (λ_c=5)	Obj.Value (test set)	462.93(29.91)	5681.58(495.80)	100996.65(362.86)	139738.93(529.61)	302361.38(4442.35)
	Max Eq.	16.31(1.00)	71.27(3.58)	72.97(0.74)	73.63(4.56)	79.23(3.81)
	Avg. Eq.	2.31(0.10)	16.19(0.12)	16.81(0.03)	16.71(0.03)	16.72(0.07)
	Inference Time [s]	0.001(0.000)	0.001(0.000)	0.001(0.001)	0.002(0.001)	0.001(0.001)
	Training Time [s]	746.28(4.81)	753.77(15.16)	768.14(36.30)	837.93(33.70)	907.56(39.96)
	Epochs	1000	1000	1000	1000	1000
	Folder experiment	\ENFORCE\training_output\10\function_custom\nonlinear\run_20250509_122336	\ENFORCE\training_output\30\function_custom\nonlinear\run_20250509_173021	\ENFORCE\training_output\50\function_custom\nonlinear\run_20250508_184652	\ENFORCE\training_output\70\function_custom\nonlinear\run_20250510_091741	\ENFORCE\training_output\150\function_custom\nonlinear\run_20250512_085002
MLP + soft (λ_c=1)	Obj.Value (test set)	61.93(3.31)	11417.10(120.25)	20252.34(37.48)	28118.12(103.53)	60344.82(37.36)
	Max Eq.	15.67(1.43)	70.39(3.46)	72.18(2.21)	73.80(5.78)	79.30(3.70)
	Avg. Eq.	2.16(0.06)	16.21(0.14)	16.81(0.01)	16.71(0.04)	16.68(0.06)
	Inference Time [s]	0.001(0.000)	0.002(0.000)	0.002(0.001)	0.001(0.001)	0.001(0.000)
	Training Time [s]	747.72(6.77)	755.12(18.07)	659.26(37.83)	833.27(34.77)	902.60(37.36)
	Epochs	1000	1000	1000	1000	1000
	Folder experiment	\ENFORCE\training_output\10\function_custom\nonlinear\run_20250509_122440	\ENFORCE\training_output\30\function_custom\nonlinear\run_20250509_180926	\ENFORCE\training_output\50\function_custom\nonlinear\run_20250508_220524	\ENFORCE\training_output\70\function_custom\nonlinear\run_20250510_091813	\ENFORCE\training_output\150\function_custom\nonlinear\run_20250512_085048
MLP + soft (λ_c=0.1)	Obj.Value (test set)	-18.29(1.21)	1150.71(24.54)	2061.29(3.35)	2925.00(26.96)	6114.06(14.47)
	Max Eq.	16.18(0.55)	70.37(5.08)	76.56(2.35)	75.36(2.70)	78.35(1.95)
	Avg. Eq.	2.05(0.17)	16.35(0.08)	16.86(0.05)	16.77(0.07)	16.63(0.01)
	Inference Time [s]	0.001(0.000)	0.001(0.000)	0.002(0.001)	0.001(0.001)	0.002(0.001)
	Training Time [s]	692.57(3.20)	751.71(24.54)	714.30(3.35)	831.07(43.95)	896.93(45.32)
	Epochs	1000	1000	1000	1000	1000
	Folder experiment	\ENFORCE\training_output\10\function_custom\nonlinear\run_20250509_134011	\ENFORCE\training_output\30\function_custom\nonlinear\run_20250509_181254	\ENFORCE\training_output\50\function_custom\nonlinear\run_20250508_232144	\ENFORCE\training_output\70\function_custom\nonlinear\run_20250510_092007	\ENFORCE\training_output\150\function_custom\nonlinear\run_20250512_085157

## Sheet: Linear
Nonconvex, linear constraints		N^ Equalities
		10	30	50	70	150
Variables		100	100	100	100	200
Optimizer (IPOPT)	Obj.Value (test set)			-11.11(0.00)	-4.84(0.00)	-10.64(0.00)
	Max Eq.			0.00(0.00)	0.00(0.00)	0.00(0.00)
	Avg. Eq.			0.00(0.00)	0.00(0.00)	0.00(0.00)
	Inference Time [s]			0.095(0.033)	0.13(0.04)	0.379(0.060)
	Training Time [s]	-	-	-	-	-
	Epochs	-	-	-	-	-
	Folder experiment	-	-	-	-	-
ENFORCE (λ_d=0.5)	Obj.Value (test set)			-11.50(0.01)	-4.86(0.00)	-10.59(0.00)
	Max Eq.			0.00(0.00)	0.00(0.00)	0.00(0.00)
	Avg. Eq.			0.00(0.00)	0.00(0.00)	0.00(0.00)
	Inference Time [s]			0.008(0.001)	0.010(0.001)	0.016(0.002)
	Training Time [s]			767.11(1.91)	763.03(2.22)	834.78(4.14)
	Epochs	1000	1000	1000	1000	1000
	Folder experiment			\ENFORCE\training_output\50\function_custom\nonconvex\run_20250510_112046	\ENFORCE\training_output\70\function_custom\nonconvex\run_20250510_135811	\ENFORCE\training_output\150\function_custom\nonconvex\run_20250510_175904
DC3 (λ_c=5)	Obj.Value (test set)			-10.31(10.07)	-2.76(0.06)	-6.27(0.07)
	Max Eq.			0.00(0.00)	0.00(0.00)	0.00(0.00)
	Avg. Eq.			0.00(0.00)	0.00(0.00)	0.00(0.00)
	Inference Time [s]			0.003(0.000)	0.002(0.000)	0.004(0.000)
	Training Time [s]			1377.75(223.78)	1234.43(498.22)	1511.03(517.57)
	Epochs	3500	3500	3500	3500	3500
	Folder experiment			\DC3\results\NonconvexProblem-100-0-50-10000\method\a72798119498701b77841427dbaa9483f8df6c6e
MLP (λ_c=0)	Obj.Value (test set)			-27.43(0.00)	-27.43(0.00)	-52.99(0.01)
	Max Eq.			24.65(0.08)	24.89(0.12)	45.38(0.56)
	Avg. Eq.			7.32(0.00)	7.19(0.00)	9.14(0.02)
	Inference Time [s]			0.001(0.000)	0.001(0.001)	0.001(0.001)
	Training Time [s]			532.00(11.04)	533.41(6.74)	540.87(14.77)
	Epochs	1000	1000	1000	1000	1000
	Folder experiment			\ENFORCE\training_output\50\function_custom\nonconvex\run_20250510_124541	\ENFORCE\training_output\70\function_custom\nonconvex\run_20250510_170322	\ENFORCE\training_output\150\function_custom\nonconvex\run_20250510_191945
MLP + soft (λ_c=5)	Obj.Value (test set)			-10.10(0.31)	-1.86(0.17)	1.28(0.32)
	Max Eq.			0.53(0.04)	0.79(0.08)	1.45(0.43)
	Avg. Eq.			0.03(0.00)	0.06(0.00)	0.08(0.00)
	Inference Time [s]			0.002(0.000)	0.001(0.000)	0.001(0.000)
	Training Time [s]			641.63(30.86)	643.34(25.77)	654.53(27.84)
	Epochs	1000	1000	1000	1000	1000
	Folder experiment			\ENFORCE\training_output\50\function_custom\nonconvex\run_20250510_124614	\ENFORCE\training_output\70\function_custom\nonconvex\run_20250510_170359	\ENFORCE\training_output\150\function_custom\nonconvex\run_20250510_192047
MLP + soft (λ_c=1)	Obj.Value (test set)			-10.69(0.01)	-4.18(0.03)	-8.18(0.18)
	Max Eq.			0.54(0.05)	0.86(0.05)	1.47(0.41)
	Avg. Eq.			0.05(0.00)	0.08(0.00)	0.09(0.00)
	Inference Time [s]			0.001(0.000)	0.001(0.000)	0.001(0.001)
	Training Time [s]			641.29(31.21)	642.01(27.86)	651.17(29.16)
	Epochs	1000	1000	1000	1000	1000
	Folder experiment			\ENFORCE\training_output\50\function_custom\nonconvex\run_20250510_124703	\ENFORCE\training_output\70\function_custom\nonconvex\run_20250510_170426	\ENFORCE\training_output\150\function_custom\nonconvex\run_20250510_192136
MLP + soft (λ_c=0.1)	Obj.Value (test set)			-12.05(0.00)	-6.82(0.01)	-13.55(0.02)
	Max Eq.			2.09(0.03)	2.51(0.08)	2.17(0.12)
	Avg. Eq.			0.36(0.00)	0.43(0.00)	0.35(0.00)
	Inference Time [s]			0.001(0.001)	0.001(0.000)	0.001(0.001)
	Training Time [s]			637.16(36.70)	643.85(31.35)	652.60(32.32)
	Epochs	1000	1000	1000	1000	1000
	Folder experiment			\ENFORCE\training_output\50\function_custom\nonconvex\run_20250510_124801	\ENFORCE\training_output\70\function_custom\nonconvex\run_20250510_170458	\ENFORCE\training_output\150\function_custom\nonconvex\run_20250510_192207

## Sheet: Nonlinear (Lean)
N^ Equality Constraints (N_C)		10	30	50	70	150
N^ Variables (N_O)		100	100	100	100	200
IPOPT	Obj.Value (test set)	-26.27(0.00)	-21.81(0.00)	-18.05(0.00)	-11.69(0.00)	-29.45(0.00)
	Max Eq.	0.00(0.00)	0.00(0.00)	0.00(0.00)	0.00(0.00)	0.00(0.00)
	Avg. Eq.	0.00(0.00)	0.00(0.00)	0.00(0.00)	0.00(0.00)	0.00(0.00)
	Inf. time [s]	0.094(0.032)	0.244(0.132)	0.268(0.125)	0.401(0.167)	3.40(1.40)
	Training Time [s]	-	-	-	-	-
	Epochs	-	-	-	-	-
ENFORCE	Obj. value	-26.37(0.00)	-21.48(0.01)	-16.68(0.01)	-7.75(0.03)	-27.77(0.02)
	Max eq.	0.00(0.00)	0.00(0.00)	0.00(0.00)	0.00(0.00)	0.00(0.00)
	Mean eq.	0.00(0.00)	0.00(0.00)	0.00(0.00)	0.00(0.00)	0.00(0.00)
	Inf. time [s]	0.013(0.002)	0.023(0.002)	0.030(0.005)	0.049(0.009)	0.14(0.08)
	Train. time [s]	1520.24(5.16)	1764.19(8.03)	2145.42(24.11)	2939.42(56.46)	4161.28(1386.70)
	Epochs	1000	1000	1000	1000	1000
MLP	Obj. value	-27.43(0.00)	-27.43(0.00)	-27.43(0.00)	-27.43(0.00)	-53.07(0.00)
	Max eq.	214.95(0.10)	317.76(0.06)	317.14(0.01)	317.97(0.73)	497.38(4.64)
	Mean eq.	59.49(0.03)	72.10(0.01)	69.63(0.00)	70.57(0.01)	118.39(0.07)
	Inf. time [s]	0.001(0.001)	0.001(0.001)	0.001(0.001)	0.001(0.001)	0.002(0.001)
	Train. time [s]	428.75(17.41)	469.98(1.34)	606.19(183.13)	565.25(20.02)	633.66(19.47
	Epochs	1000	1000	1000	1000	1000
MLP + soft (λ_c=5)	Obj. value	462.93(29.91)	5681.58(495.80)	100996.65(362.86)	139738.93(529.61)	302361.38(4442.35)
	Max eq.	16.31(1.00)	71.27(3.58)	72.97(0.74)	73.63(4.56)	79.23(3.81)
	Mean eq.	2.31(0.10)	16.19(0.12)	16.81(0.03)	16.71(0.03)	16.72(0.07)
	Inf. time [s]	0.001(0.000)	0.001(0.000)	0.001(0.001)	0.002(0.001)	0.001(0.001)
	Train. time [s]	746.28(4.81)	753.77(15.16)	768.14(36.30)	837.93(33.70)	907.56(39.96)
	Epochs	1000	1000	1000	1000	1000
MLP + soft (λ_c=1)	Obj. value	61.93(3.31)	11417.10(120.25)	20252.34(37.48)	28118.12(103.53)	60344.82(37.36)
	Max eq.	15.67(1.43)	70.39(3.46)	72.18(2.21)	73.80(5.78)	79.30(3.70)
	Mean eq.	2.16(0.06)	16.21(0.14)	16.81(0.01)	16.71(0.04)	16.68(0.06)
	Inf. time [s]	0.001(0.000)	0.002(0.000)	0.002(0.001)	0.001(0.001)	0.001(0.000)
	Train. time [s]	747.72(6.77)	755.12(18.07)	659.26(37.83)	833.27(34.77)	902.60(37.36)
	Epochs	1000	1000	1000	1000	1000
MLP + soft (λ_c=0.1)	Obj. value	-18.29(1.21)	1150.71(24.54)	2061.29(3.35)	2925.00(26.96)	6114.06(14.47)
	Max eq.	16.18(0.55)	70.37(5.08)	76.56(2.35)	75.36(2.70)	78.35(1.95)
	Mean eq.	2.05(0.17)	16.35(0.08)	16.86(0.05)	16.77(0.07)	16.63(0.01)
	Inf. time [s]	0.001(0.000)	0.001(0.000)	0.002(0.001)	0.001(0.001)	0.002(0.001)
	Train. time [s]	692.57(3.20)	751.71(24.54)	714.30(3.35)	831.07(43.95)	896.93(45.32)
	Epochs	1000	1000	1000	1000	1000

## Sheet: Linear (Lean)
Constraints	N_C	50	70	150
Variables	N_O	100	100	200
Method	Metric
IPOPT	Obj. value	-11.11(0.00)	-4.84(0.00)	-10.64(0.00)
	Max eq.	0.00(0.00)	0.00(0.00)	0.00(0.00)
	Mean eq.	0.00(0.00)	0.00(0.00)	0.00(0.00)
	Inf. time [s]	0.095(0.033)	0.13(0.04)	0.379(0.060)
	Tr. time [s]	-	-	-
	Epochs	-	-	-
MLP	Obj. value	-27.43(0.00)	-27.43(0.00)	-52.99(0.01)
	Max eq.	24.65(0.08)	24.89(0.12)	45.38(0.56)
	Mean eq.	7.32(0.00)	7.19(0.00)	9.14(0.02)
	Inf. time [s]	0.001(0.000)	0.001(0.001)	0.001(0.001)
	Tr. time [s]	532.00(11.04)	533.41(6.74)	540.87(14.77)
	Epochs	1000	1000	1000
Soft	Obj. value	-10.10(0.31)	-1.86(0.17)	1.28(0.32)
(λ_c=5)	Max eq.	0.53(0.04)	0.79(0.08)	1.45(0.43)
	Mean eq.	0.03(0.00)	0.06(0.00)	0.08(0.00)
	Inf. time [s]	0.002(0.000)	0.001(0.000)	0.001(0.000)
	Tr. time [s]	641.63(30.86)	643.34(25.77)	654.53(27.84)
	Epochs	1000	1000	1000
Soft	Obj. value	-10.69(0.01)	-4.18(0.03)	-8.18(0.18)
(λ_c=1)	Max eq.	0.54(0.05)	0.86(0.05)	1.47(0.41)
	Mean eq.	0.05(0.00)	0.08(0.00)	0.09(0.00)
	Inf. time [s]	0.001(0.000)	0.001(0.000)	0.001(0.001)
	Tr. time [s]	641.29(31.21)	642.01(27.86)	651.17(29.16)
	Epochs	1000	1000	1000
Soft	Obj. value	-12.05(0.00)	-6.82(0.01)	-13.55(0.02)
(λ_c=0.1)	Max eq.	2.09(0.03)	2.51(0.08)	2.17(0.12)
	Mean eq.	0.36(0.00)	0.43(0.00)	0.35(0.00)
	Inf. time [s]	0.001(0.001)	0.001(0.000)	0.001(0.001)
	Tr. time [s]	637.16(36.70)	643.85(31.35)	652.60(32.32)
	Epochs	1000	1000	1000
DC3	Obj. value	-10.31(10.07)	-2.76(0.06)	-6.27(0.07)
	Max eq.	0.00(0.00)	0.00(0.00)	0.00(0.00)
	Mean eq.	0.00(0.00)	0.00(0.00)	0.00(0.00)
	Inf. time [s]	0.003(0.000)	0.002(0.000)	0.004(0.000)
	Tr. time [s]	1377.75(223.78)	1234.43(498.22)	1511.03(517.57)
	Epochs	3500	3500	3500
ENFORCE	Obj. value	-11.50(0.01)	-4.86(0.00)	-10.59(0.00)
	Max eq.	0.00(0.00)	0.00(0.00)	0.00(0.00)
	Mean eq.	0.00(0.00)	0.00(0.00)	0.00(0.00)
	Inf. time [s]	0.008(0.001)	0.010(0.001)	0.016(0.002)
	Tr. time [s]	767.11(1.91)	763.03(2.22)	834.78(4.14)
	Epochs	1000	1000	1000
