# Supplementary material
Source: ML conference proceedings conference paper supplement (https://openreview.net/forum?id=6XdUI9Cibc)

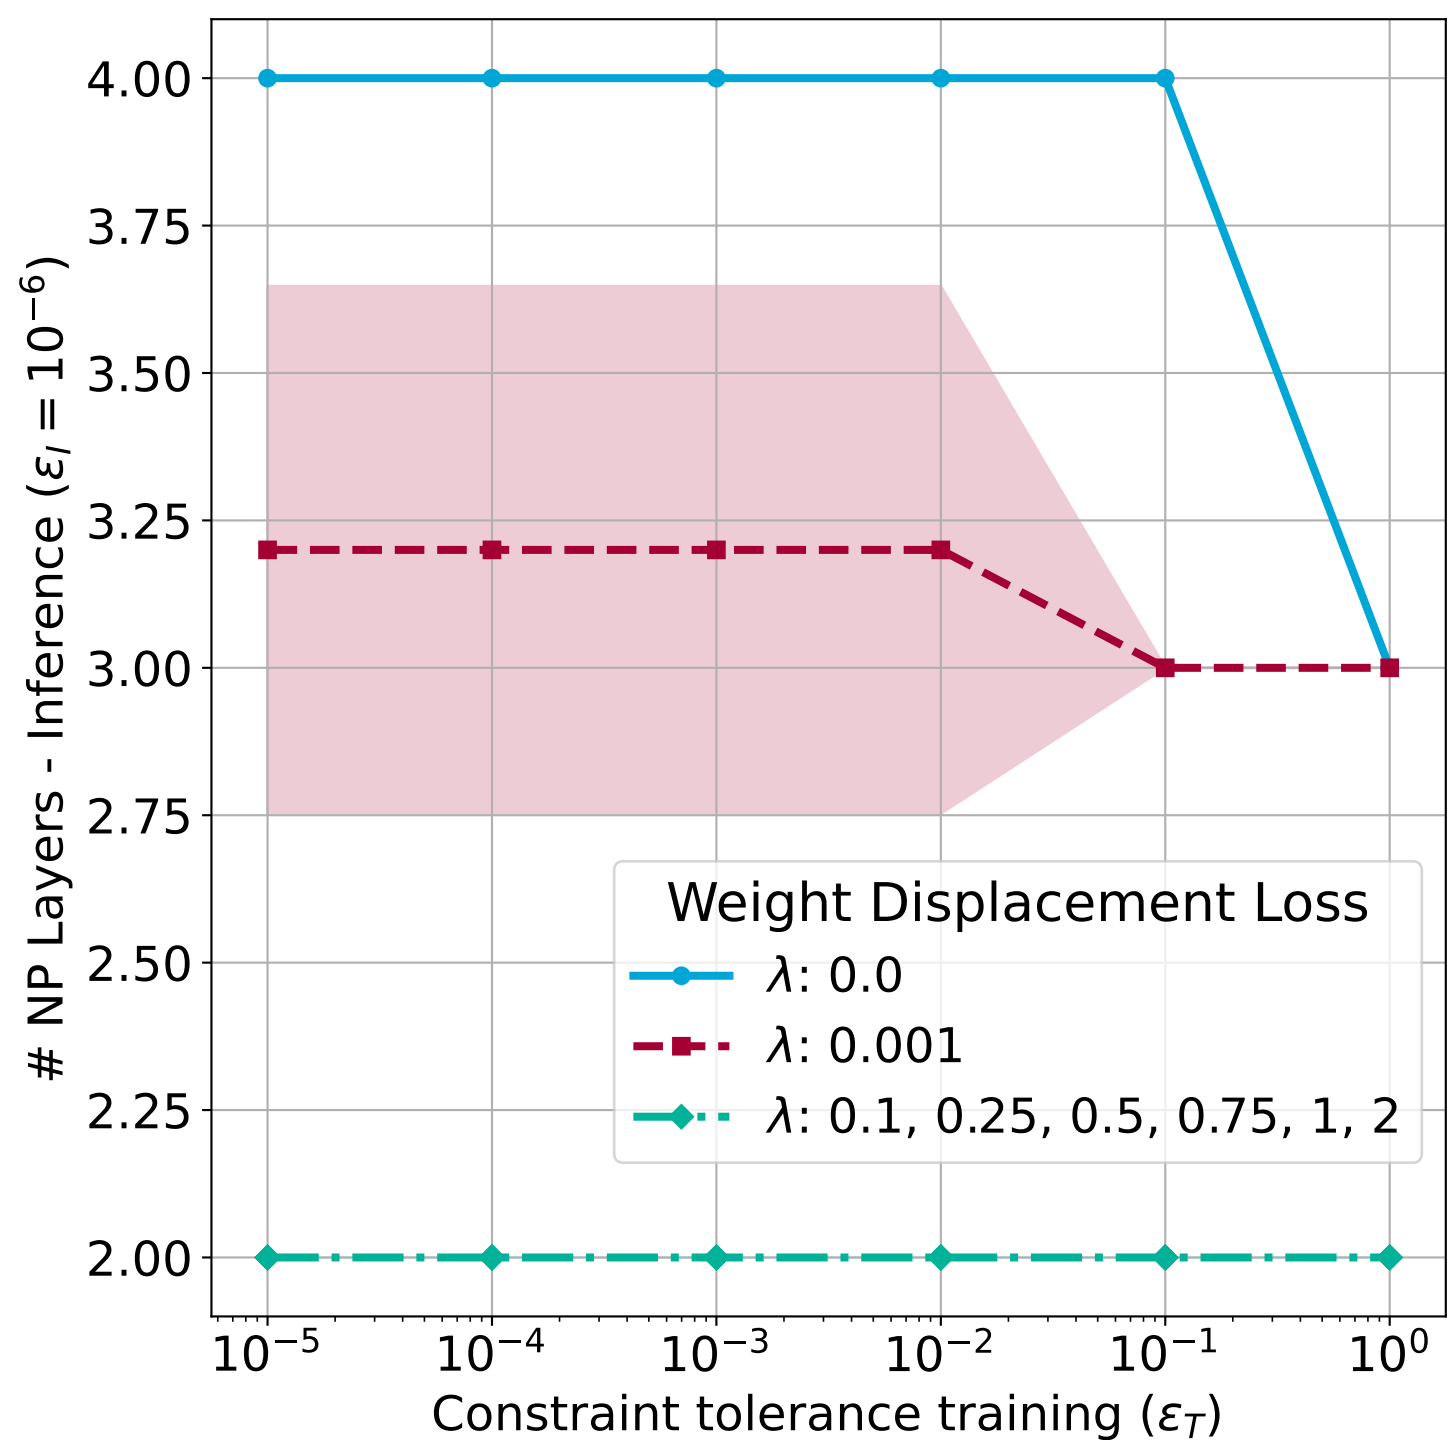

Supplement: supplementary_material [file NPs_inference_with_colors.pdf › ENFORCE_SupplementalMaterial_ICLR/ENFORCE_SupplementalMaterial/ENFORCE/reports/figures/NPs_inference_with_colors.pdf]

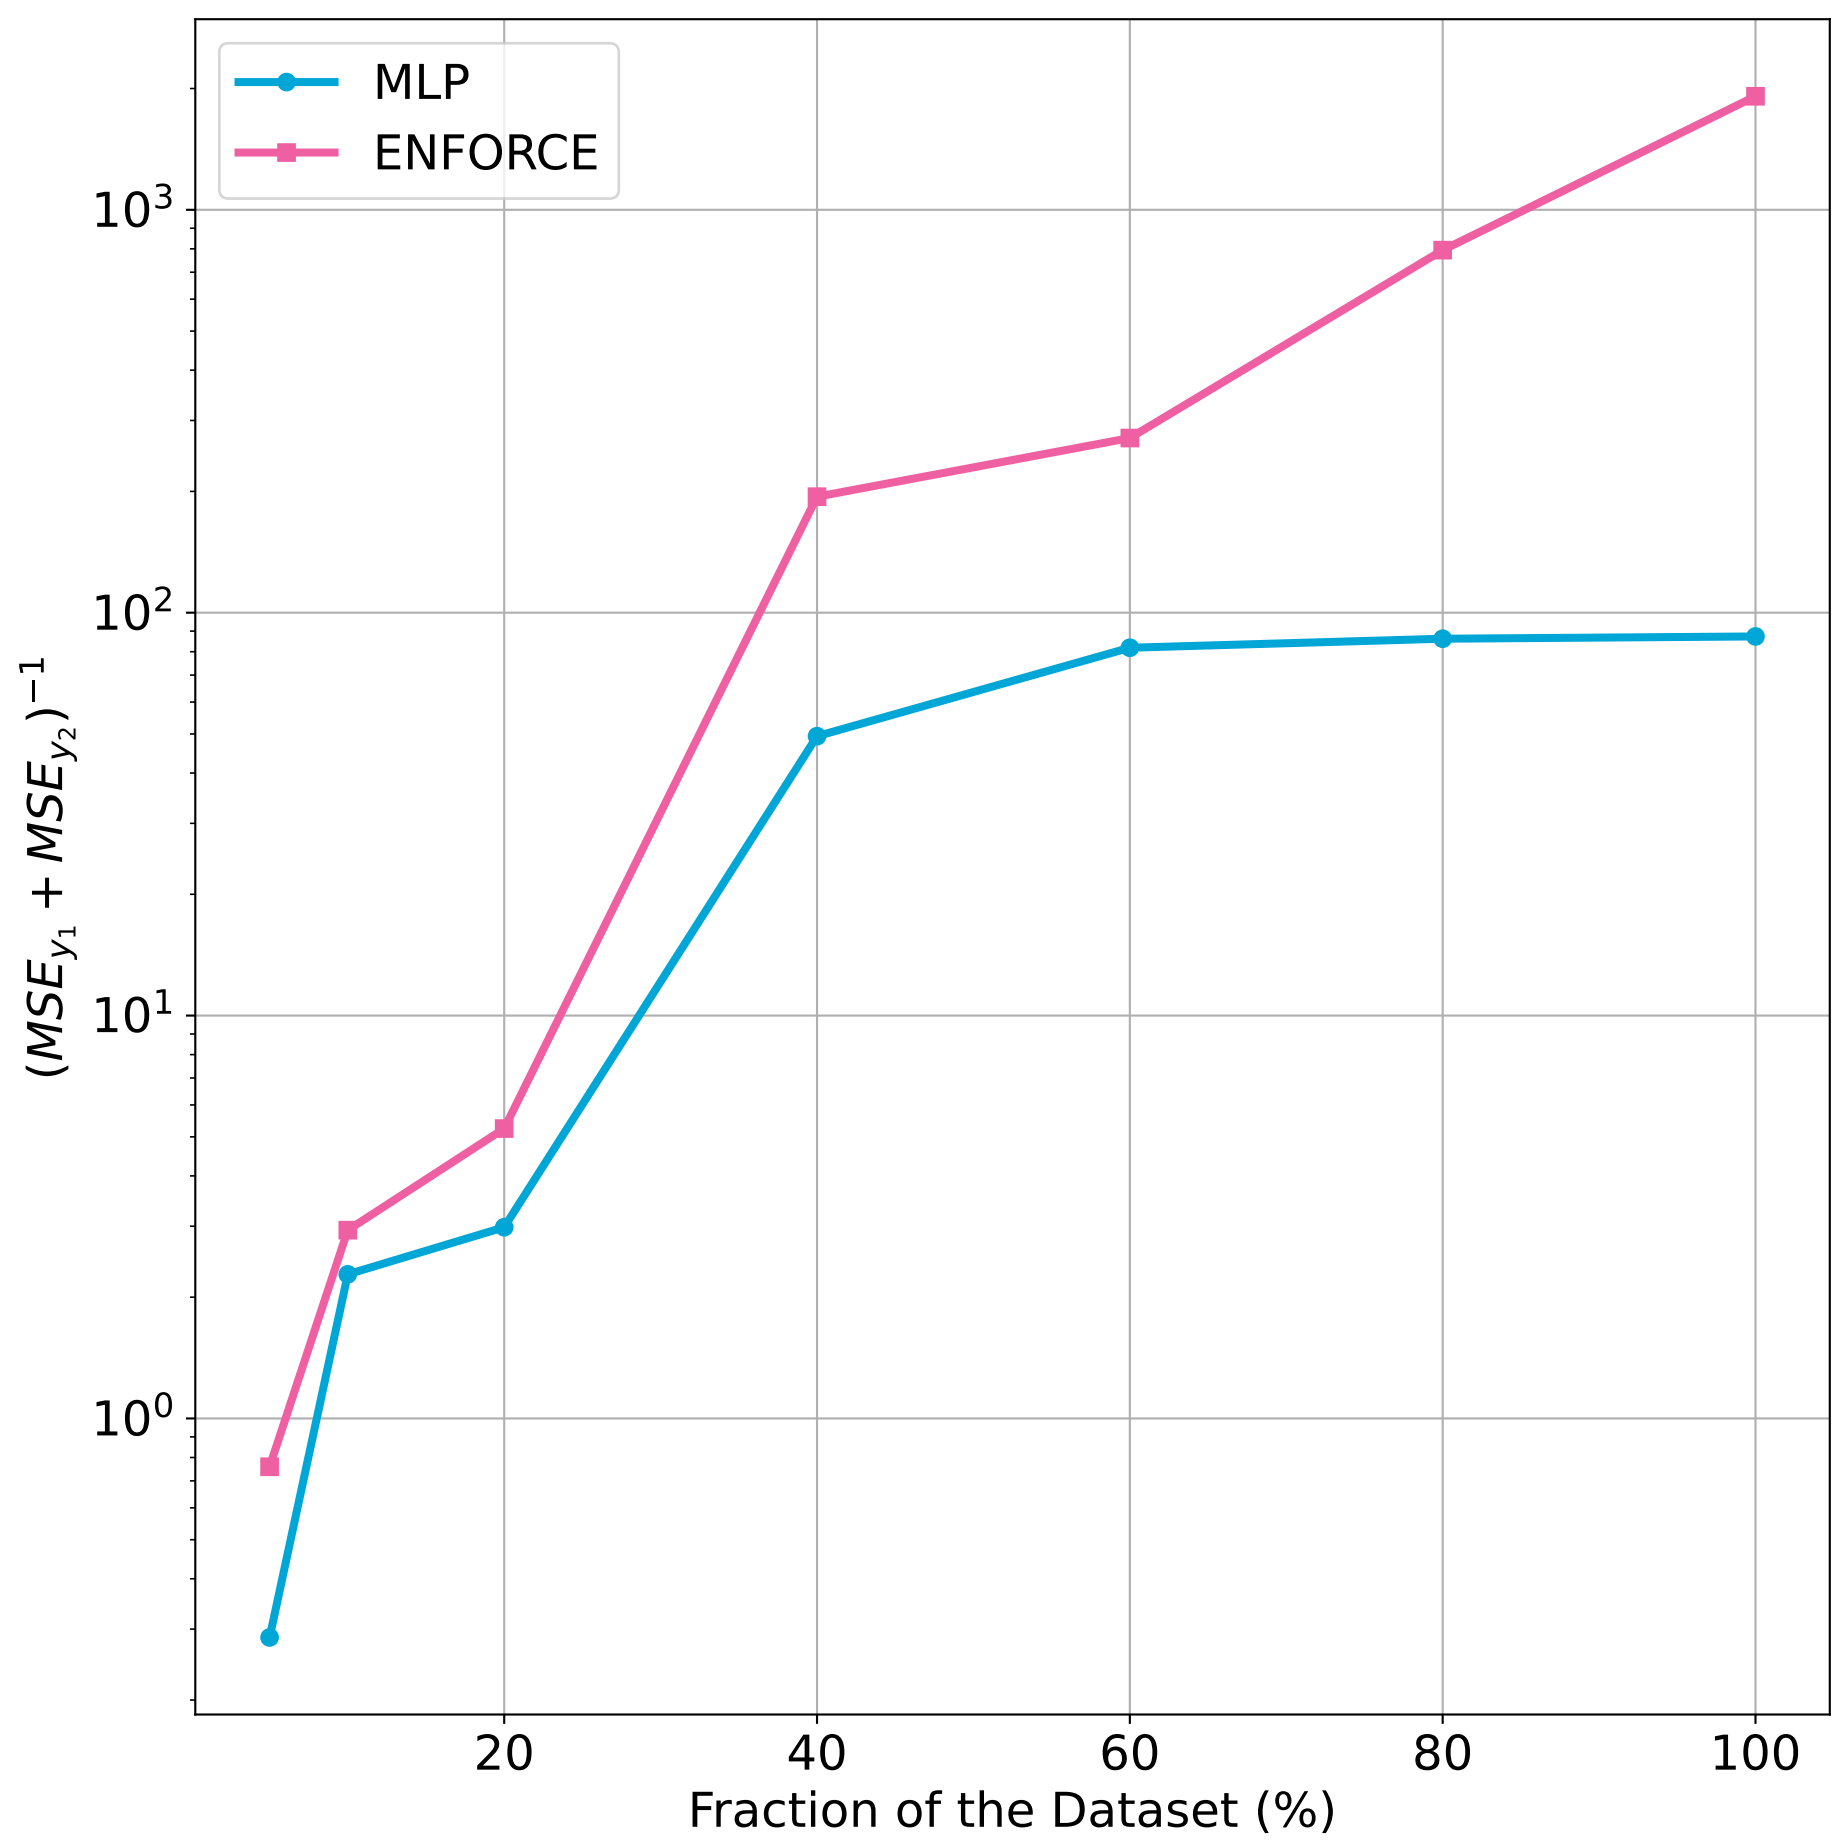

Supplement: supplementary_material [file data_scarcity.pdf › ENFORCE_SupplementalMaterial_ICLR/ENFORCE_SupplementalMaterial/ENFORCE/reports/figures/data_scarcity.pdf]

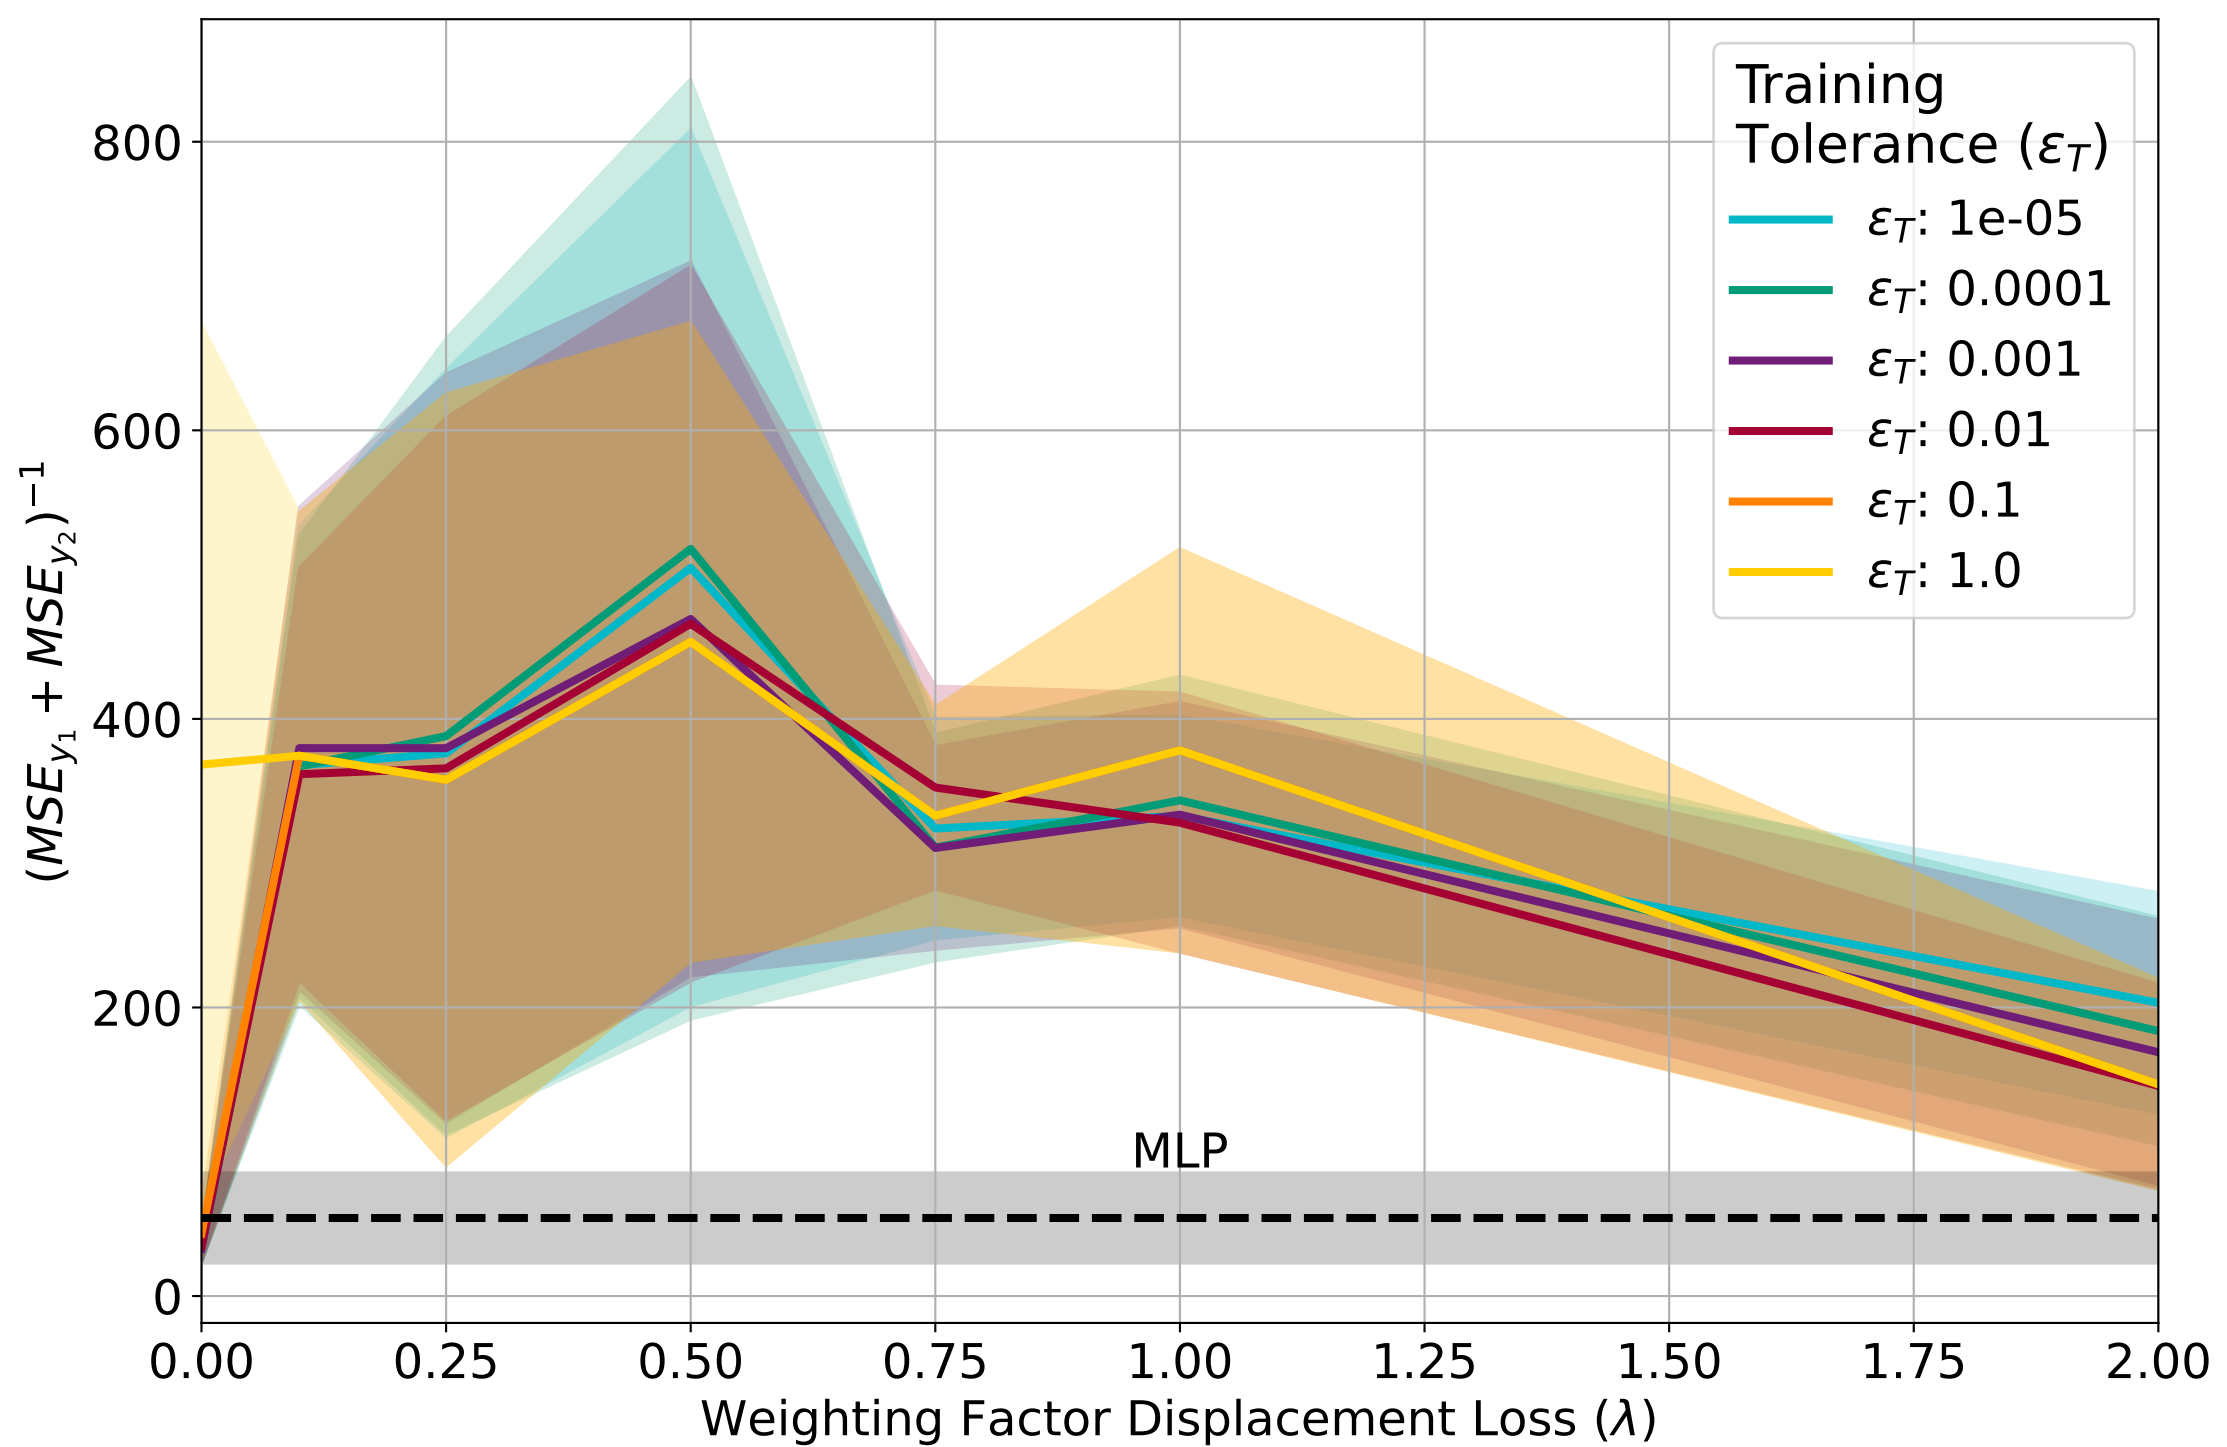

Supplement: supplementary_material [file lambda_epsilon.pdf › ENFORCE_SupplementalMaterial_ICLR/ENFORCE_SupplementalMaterial/ENFORCE/reports/figures/lambda_epsilon.pdf]

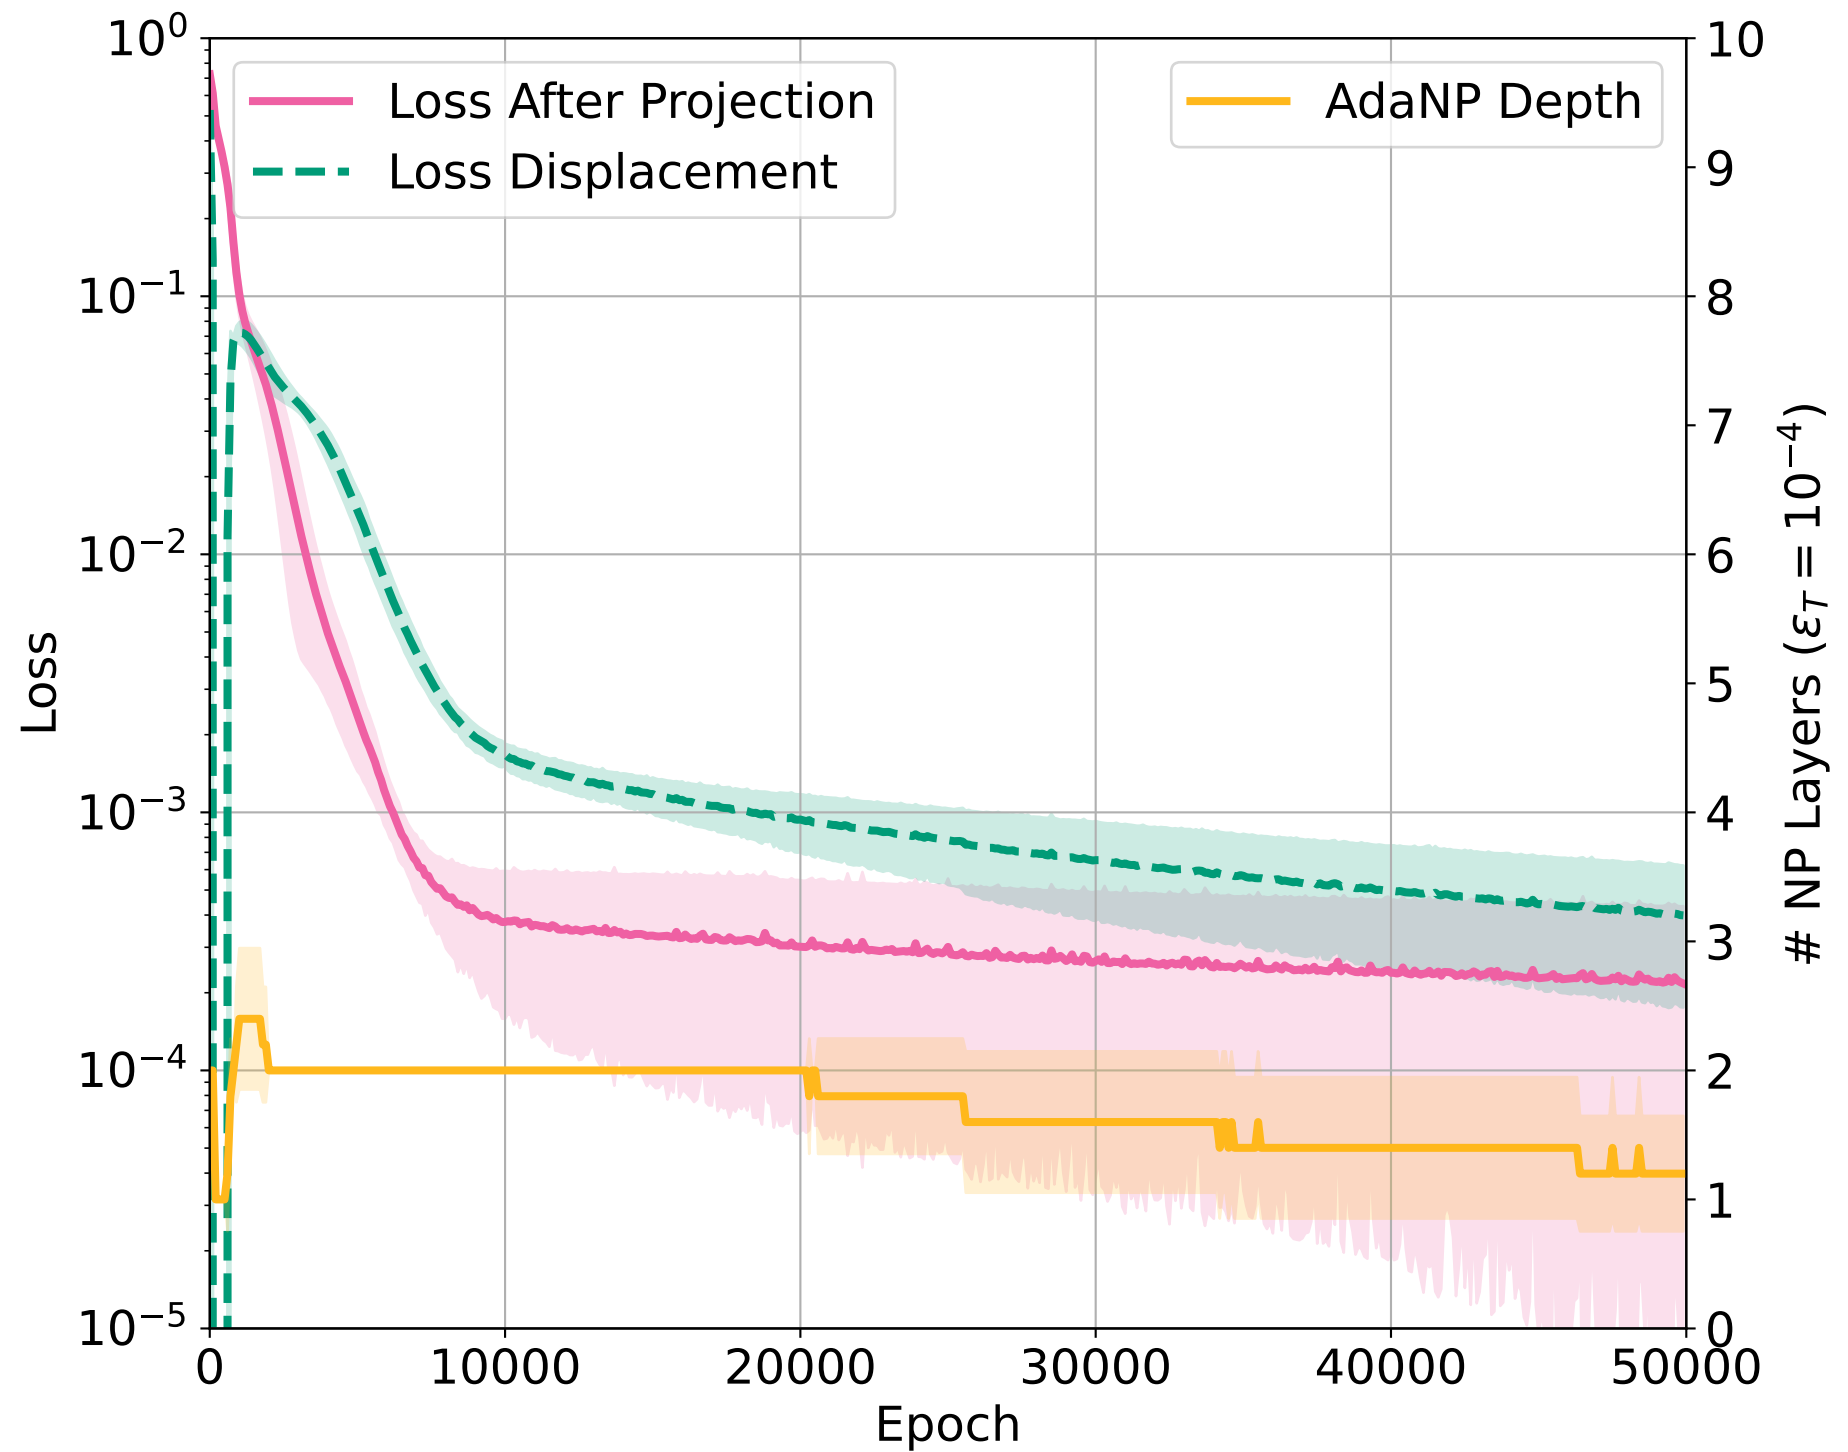

Supplement: supplementary_material [file loss_and_projection_iterations_downsampled.pdf › ENFORCE_SupplementalMaterial_ICLR/ENFORCE_SupplementalMaterial/ENFORCE/reports/figures/loss_and_projection_iterations_downsampled.pdf]

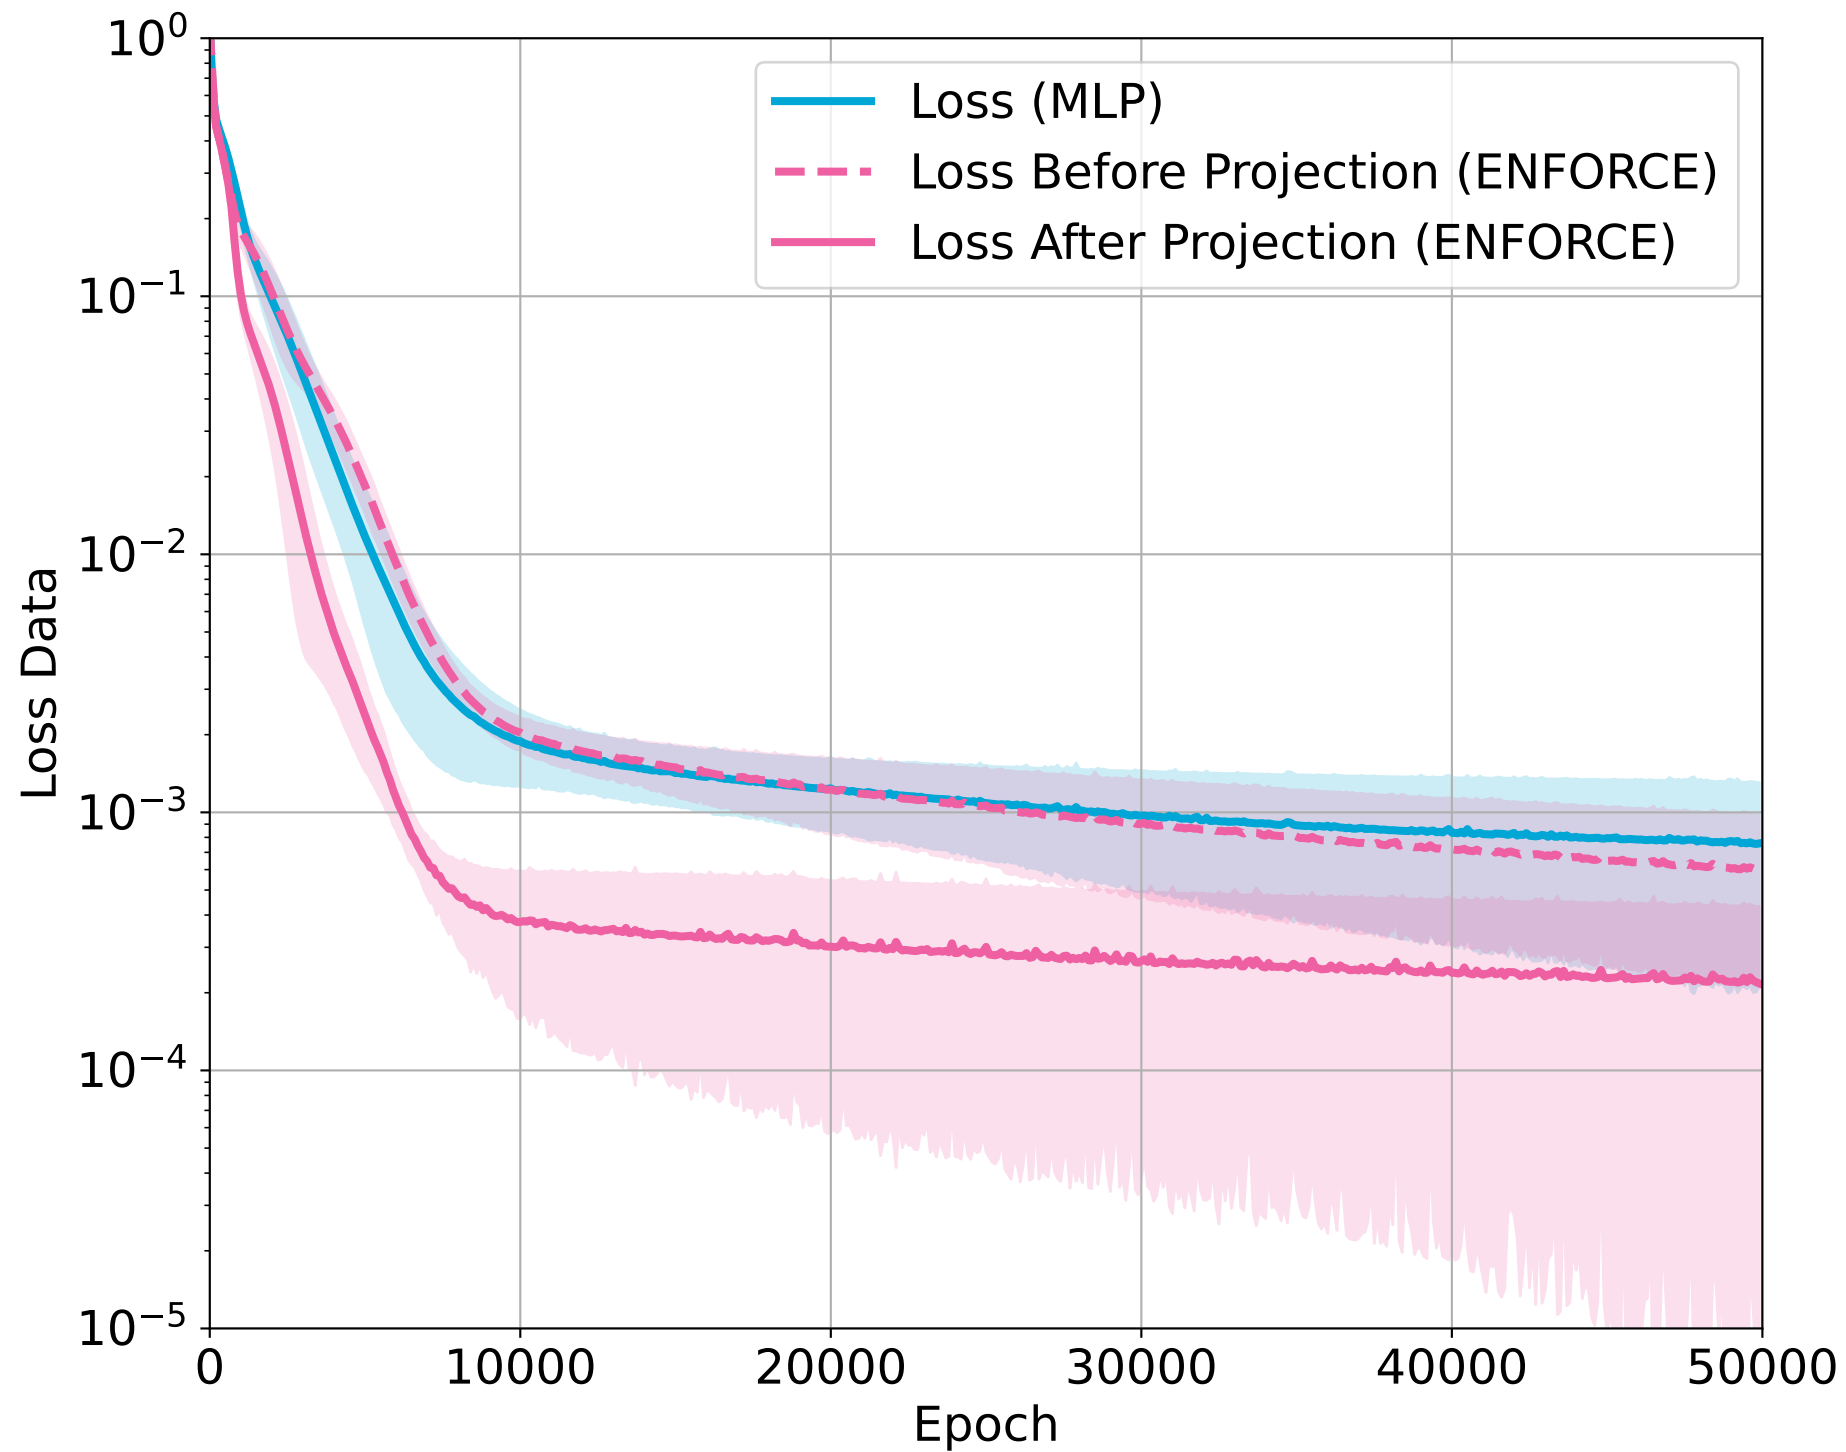

Supplement: supplementary_material [file loss_comparison_downsampled.pdf › ENFORCE_SupplementalMaterial_ICLR/ENFORCE_SupplementalMaterial/ENFORCE/reports/figures/loss_comparison_downsampled.pdf]

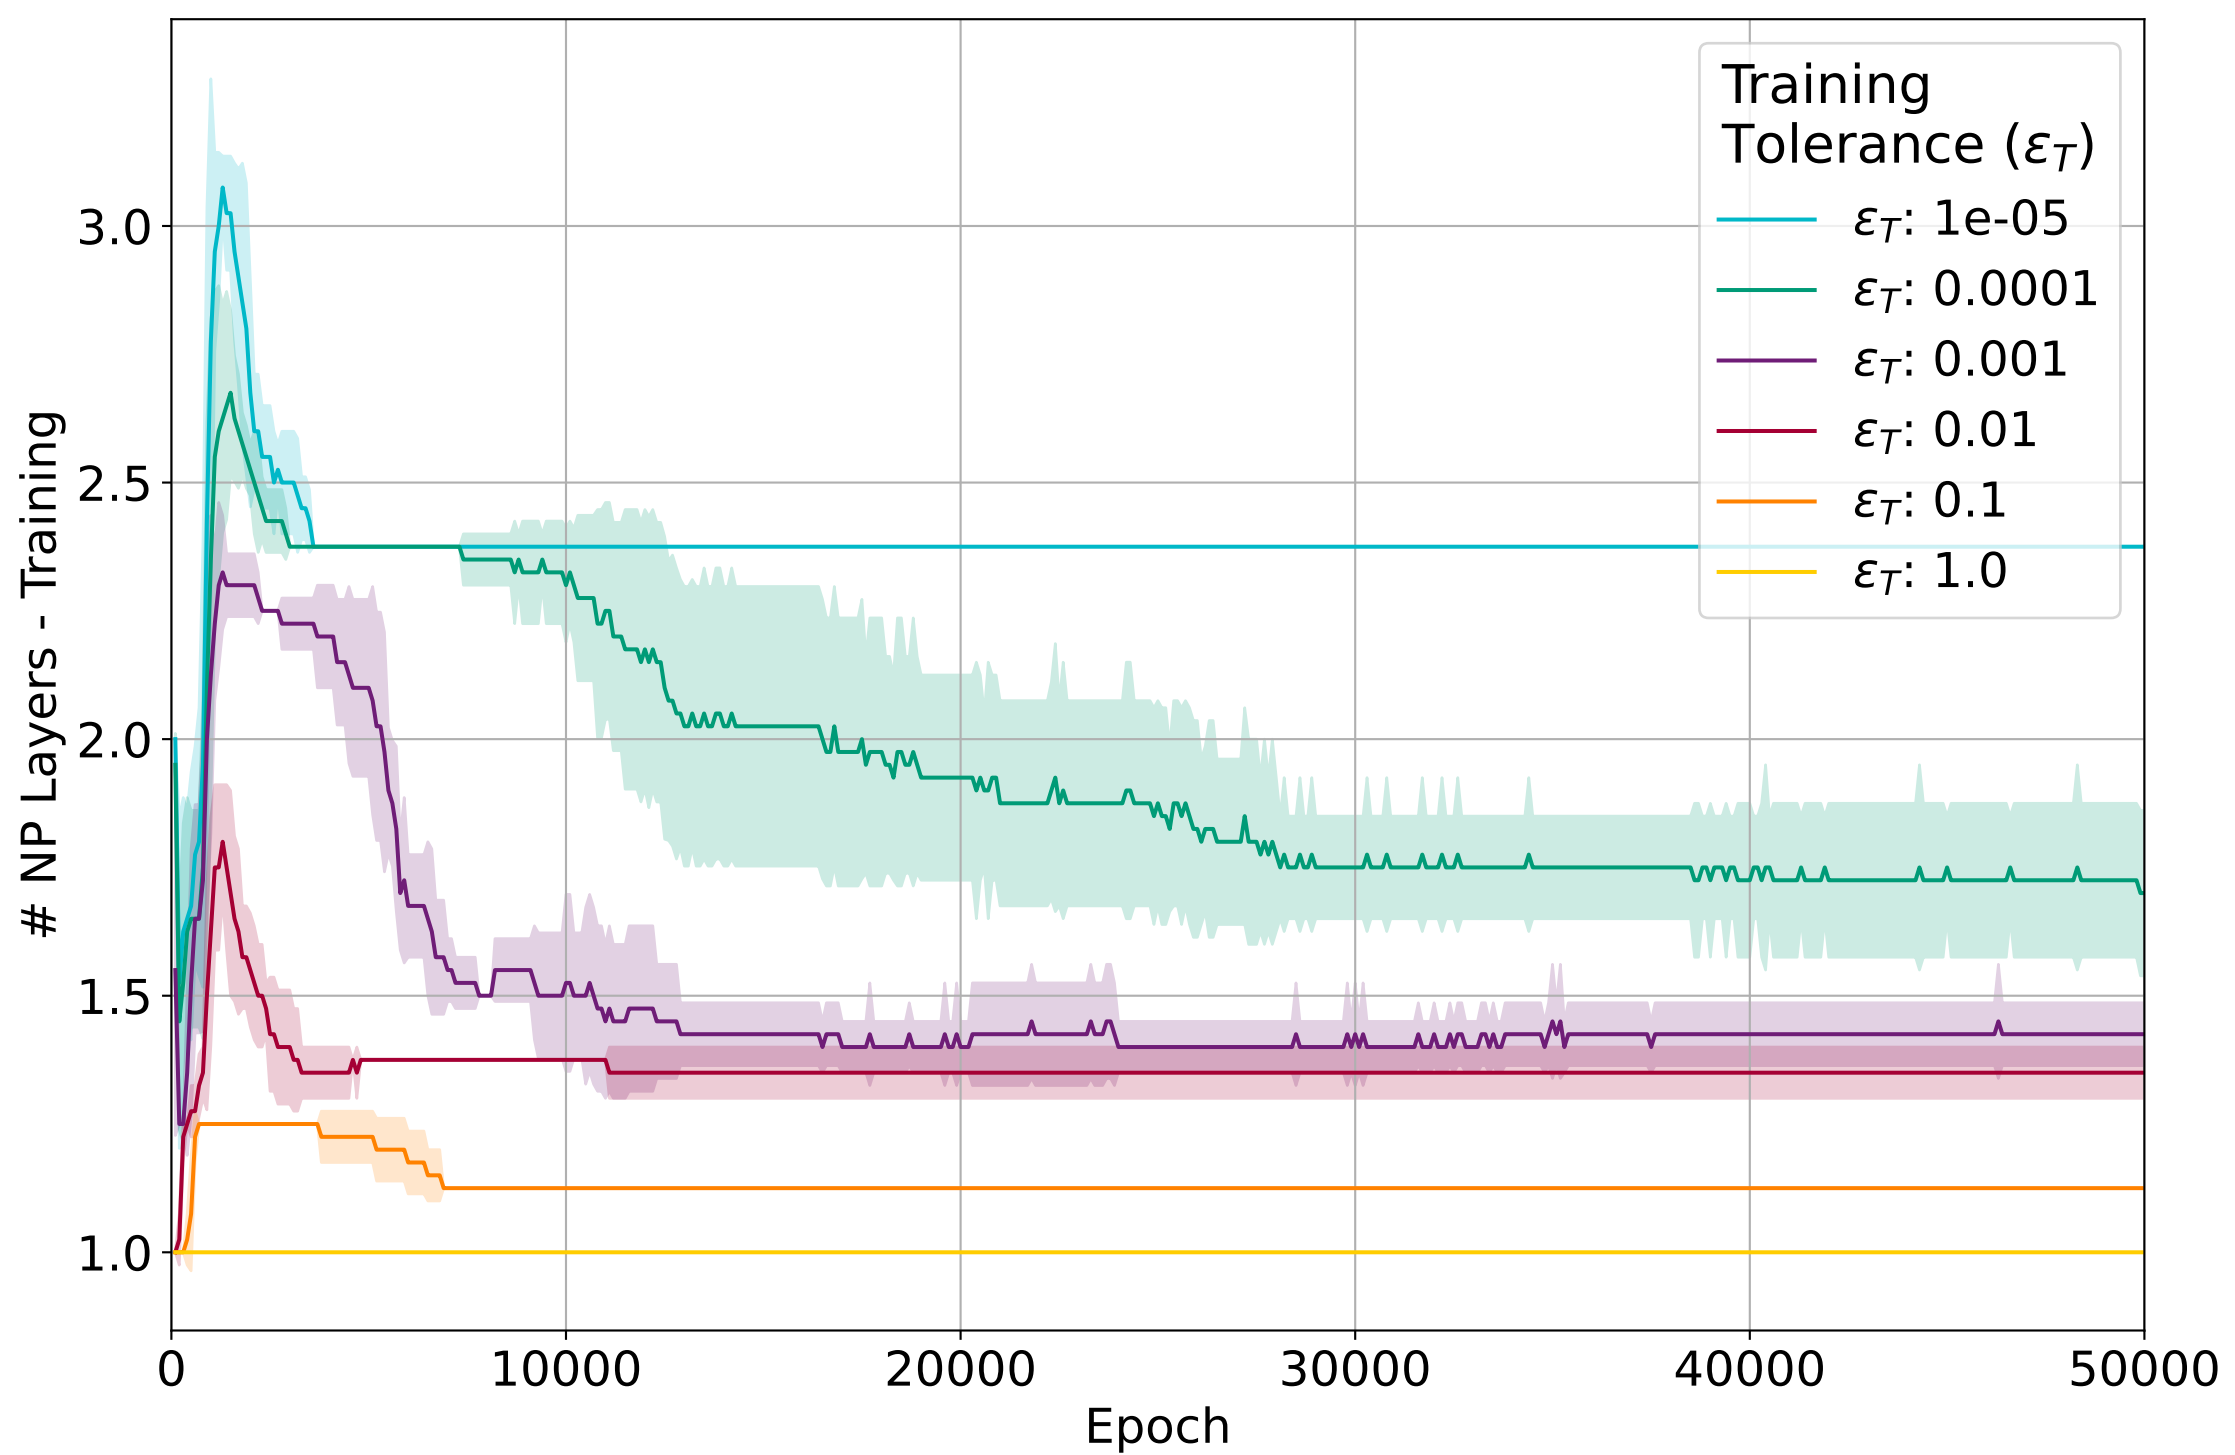

Supplement: supplementary_material [file proj_training_downsampled.pdf › ENFORCE_SupplementalMaterial_ICLR/ENFORCE_SupplementalMaterial/ENFORCE/reports/figures/proj_training_downsampled.pdf]

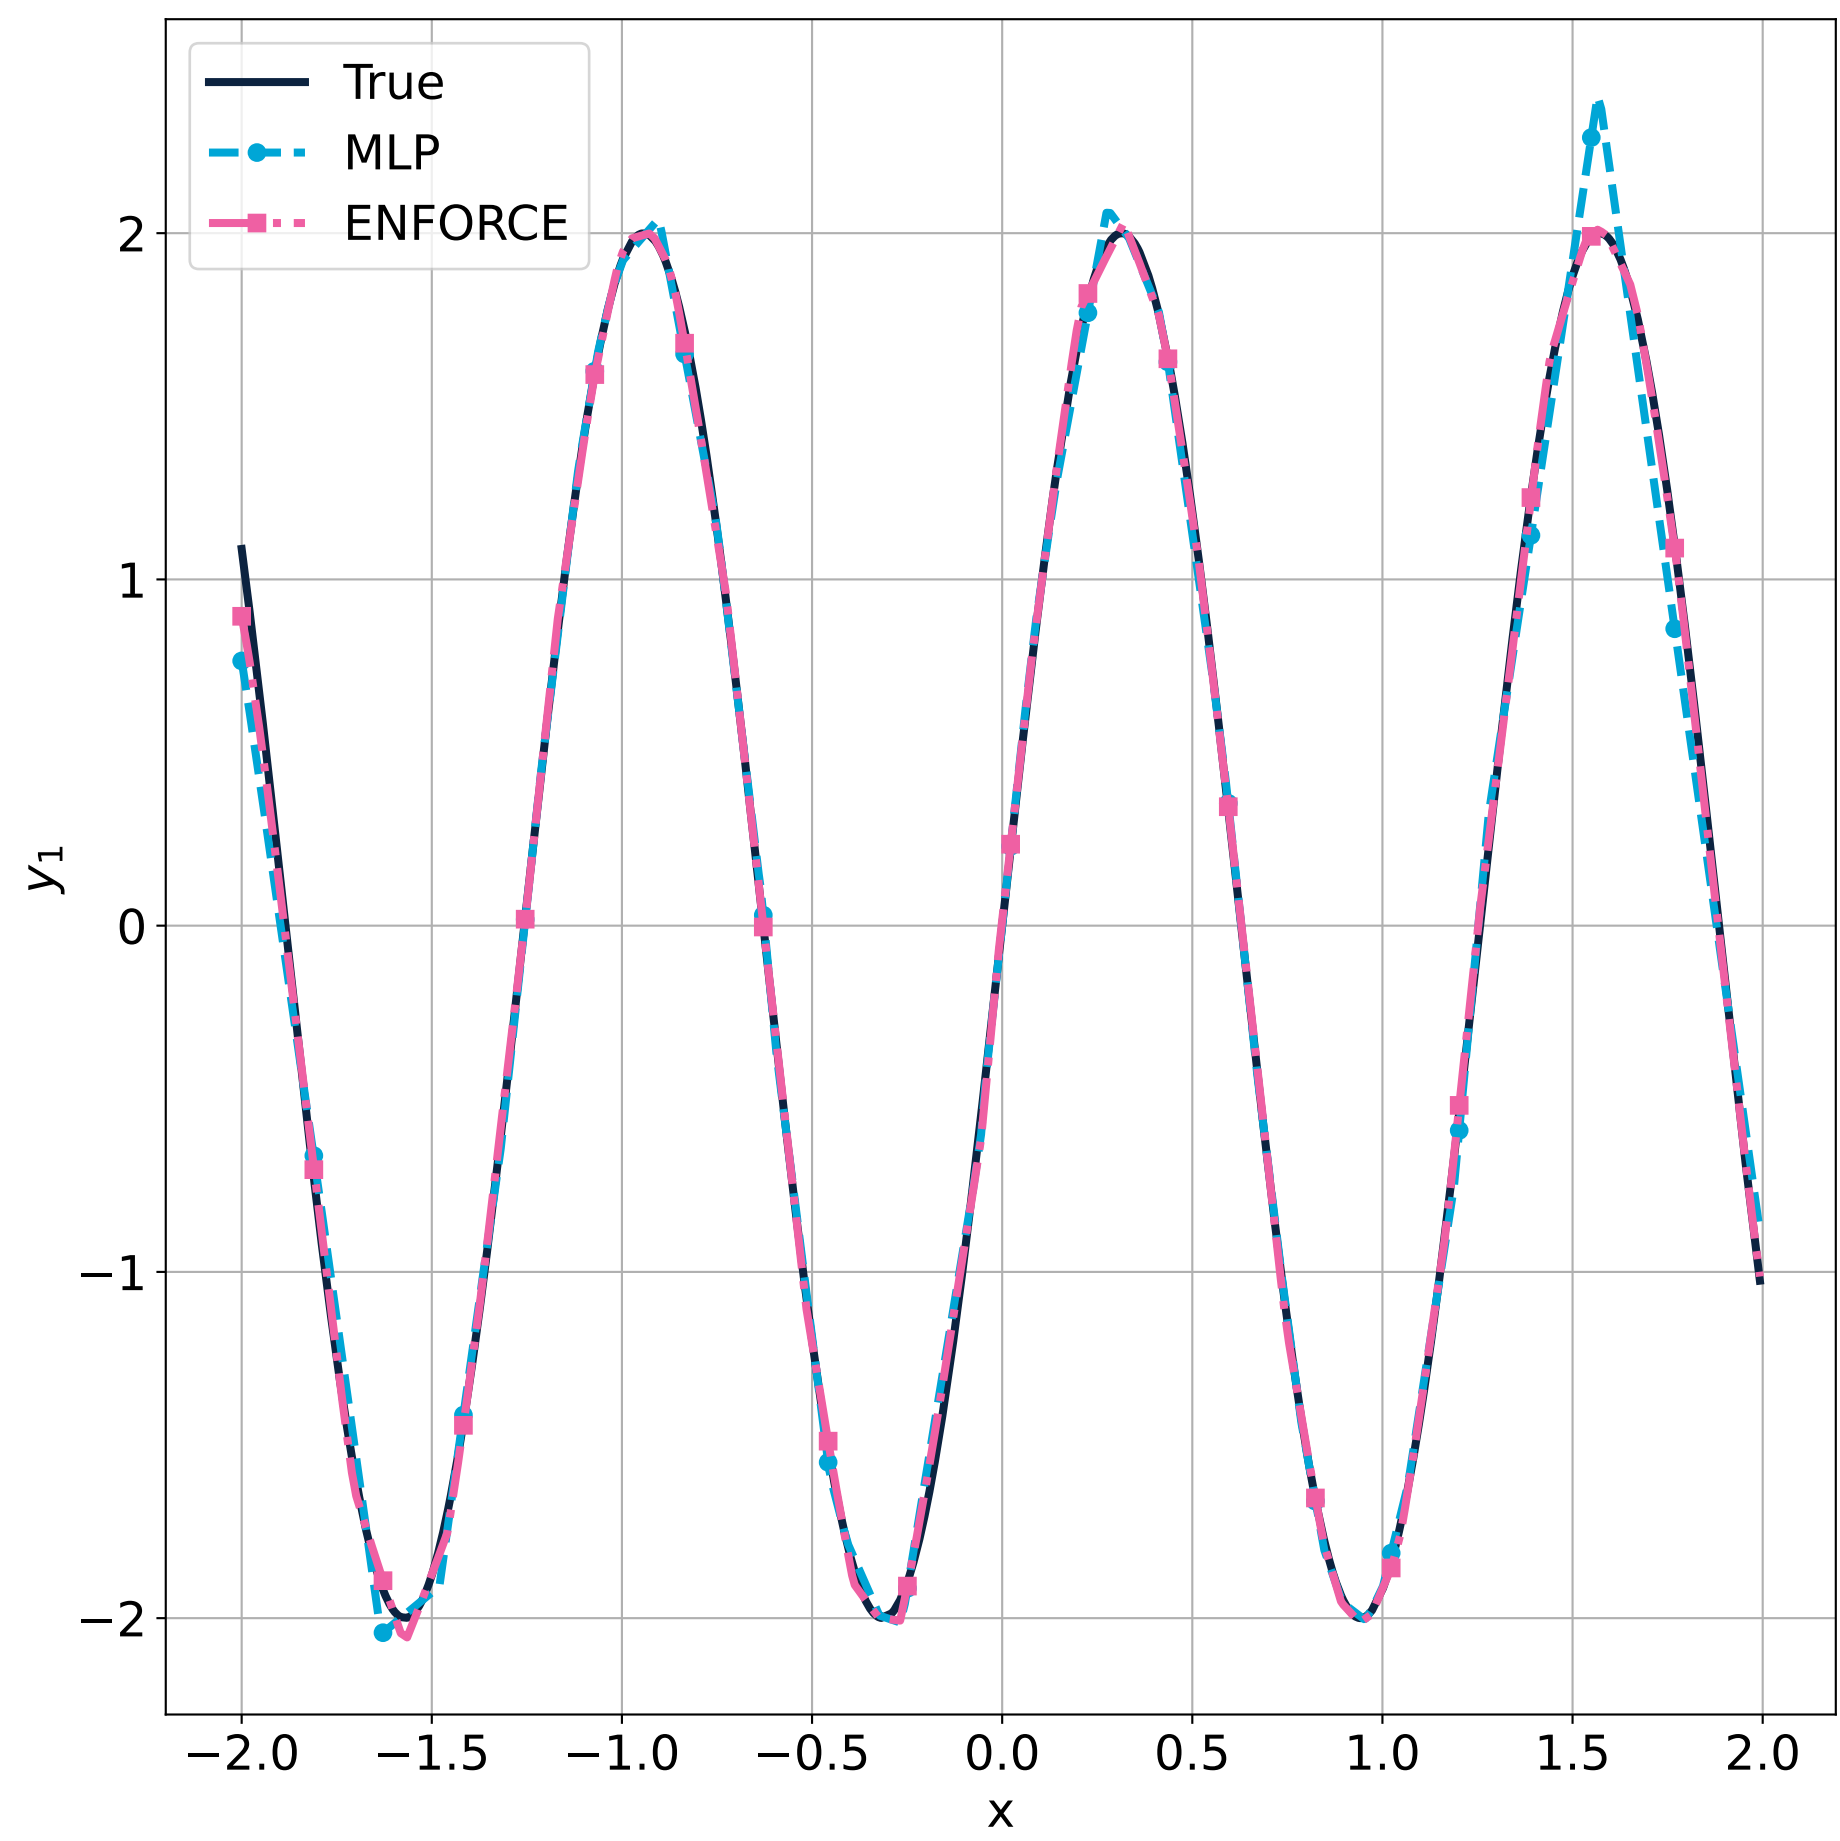

Supplement: supplementary_material [file y1_vs_x_improved.pdf › ENFORCE_SupplementalMaterial_ICLR/ENFORCE_SupplementalMaterial/ENFORCE/reports/figures/y1_vs_x_improved.pdf]

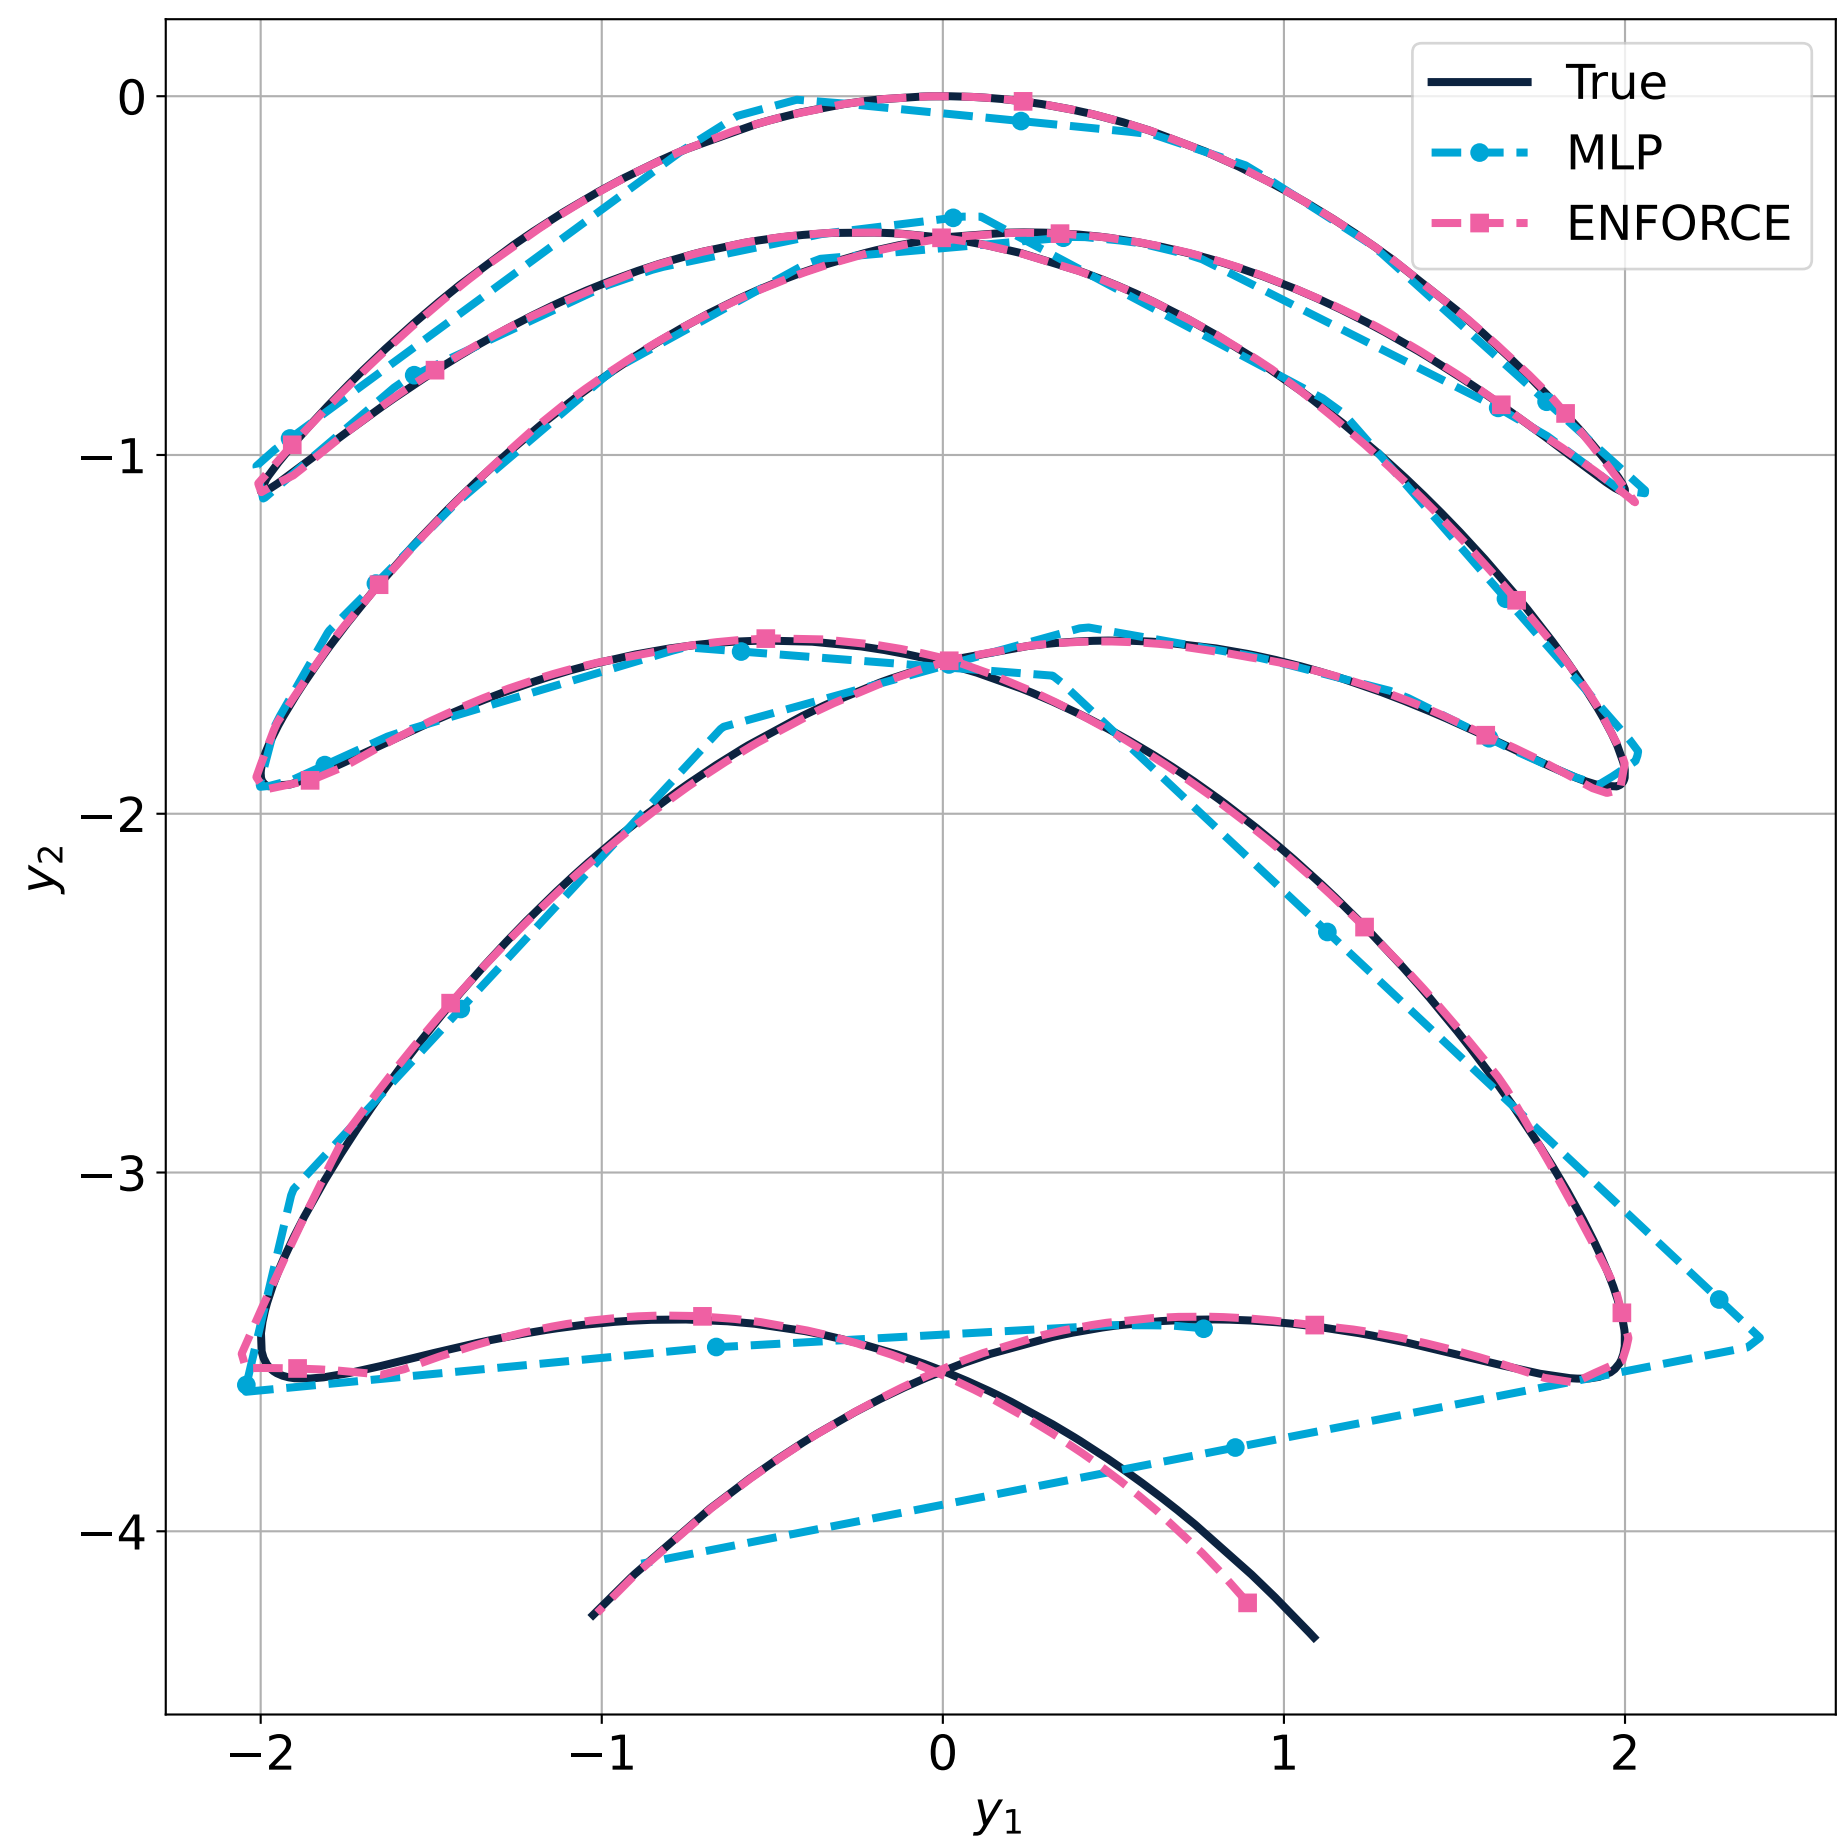

Supplement: supplementary_material [file y1_y2_plane.pdf › ENFORCE_SupplementalMaterial_ICLR/ENFORCE_SupplementalMaterial/ENFORCE/reports/figures/y1_y2_plane.pdf]

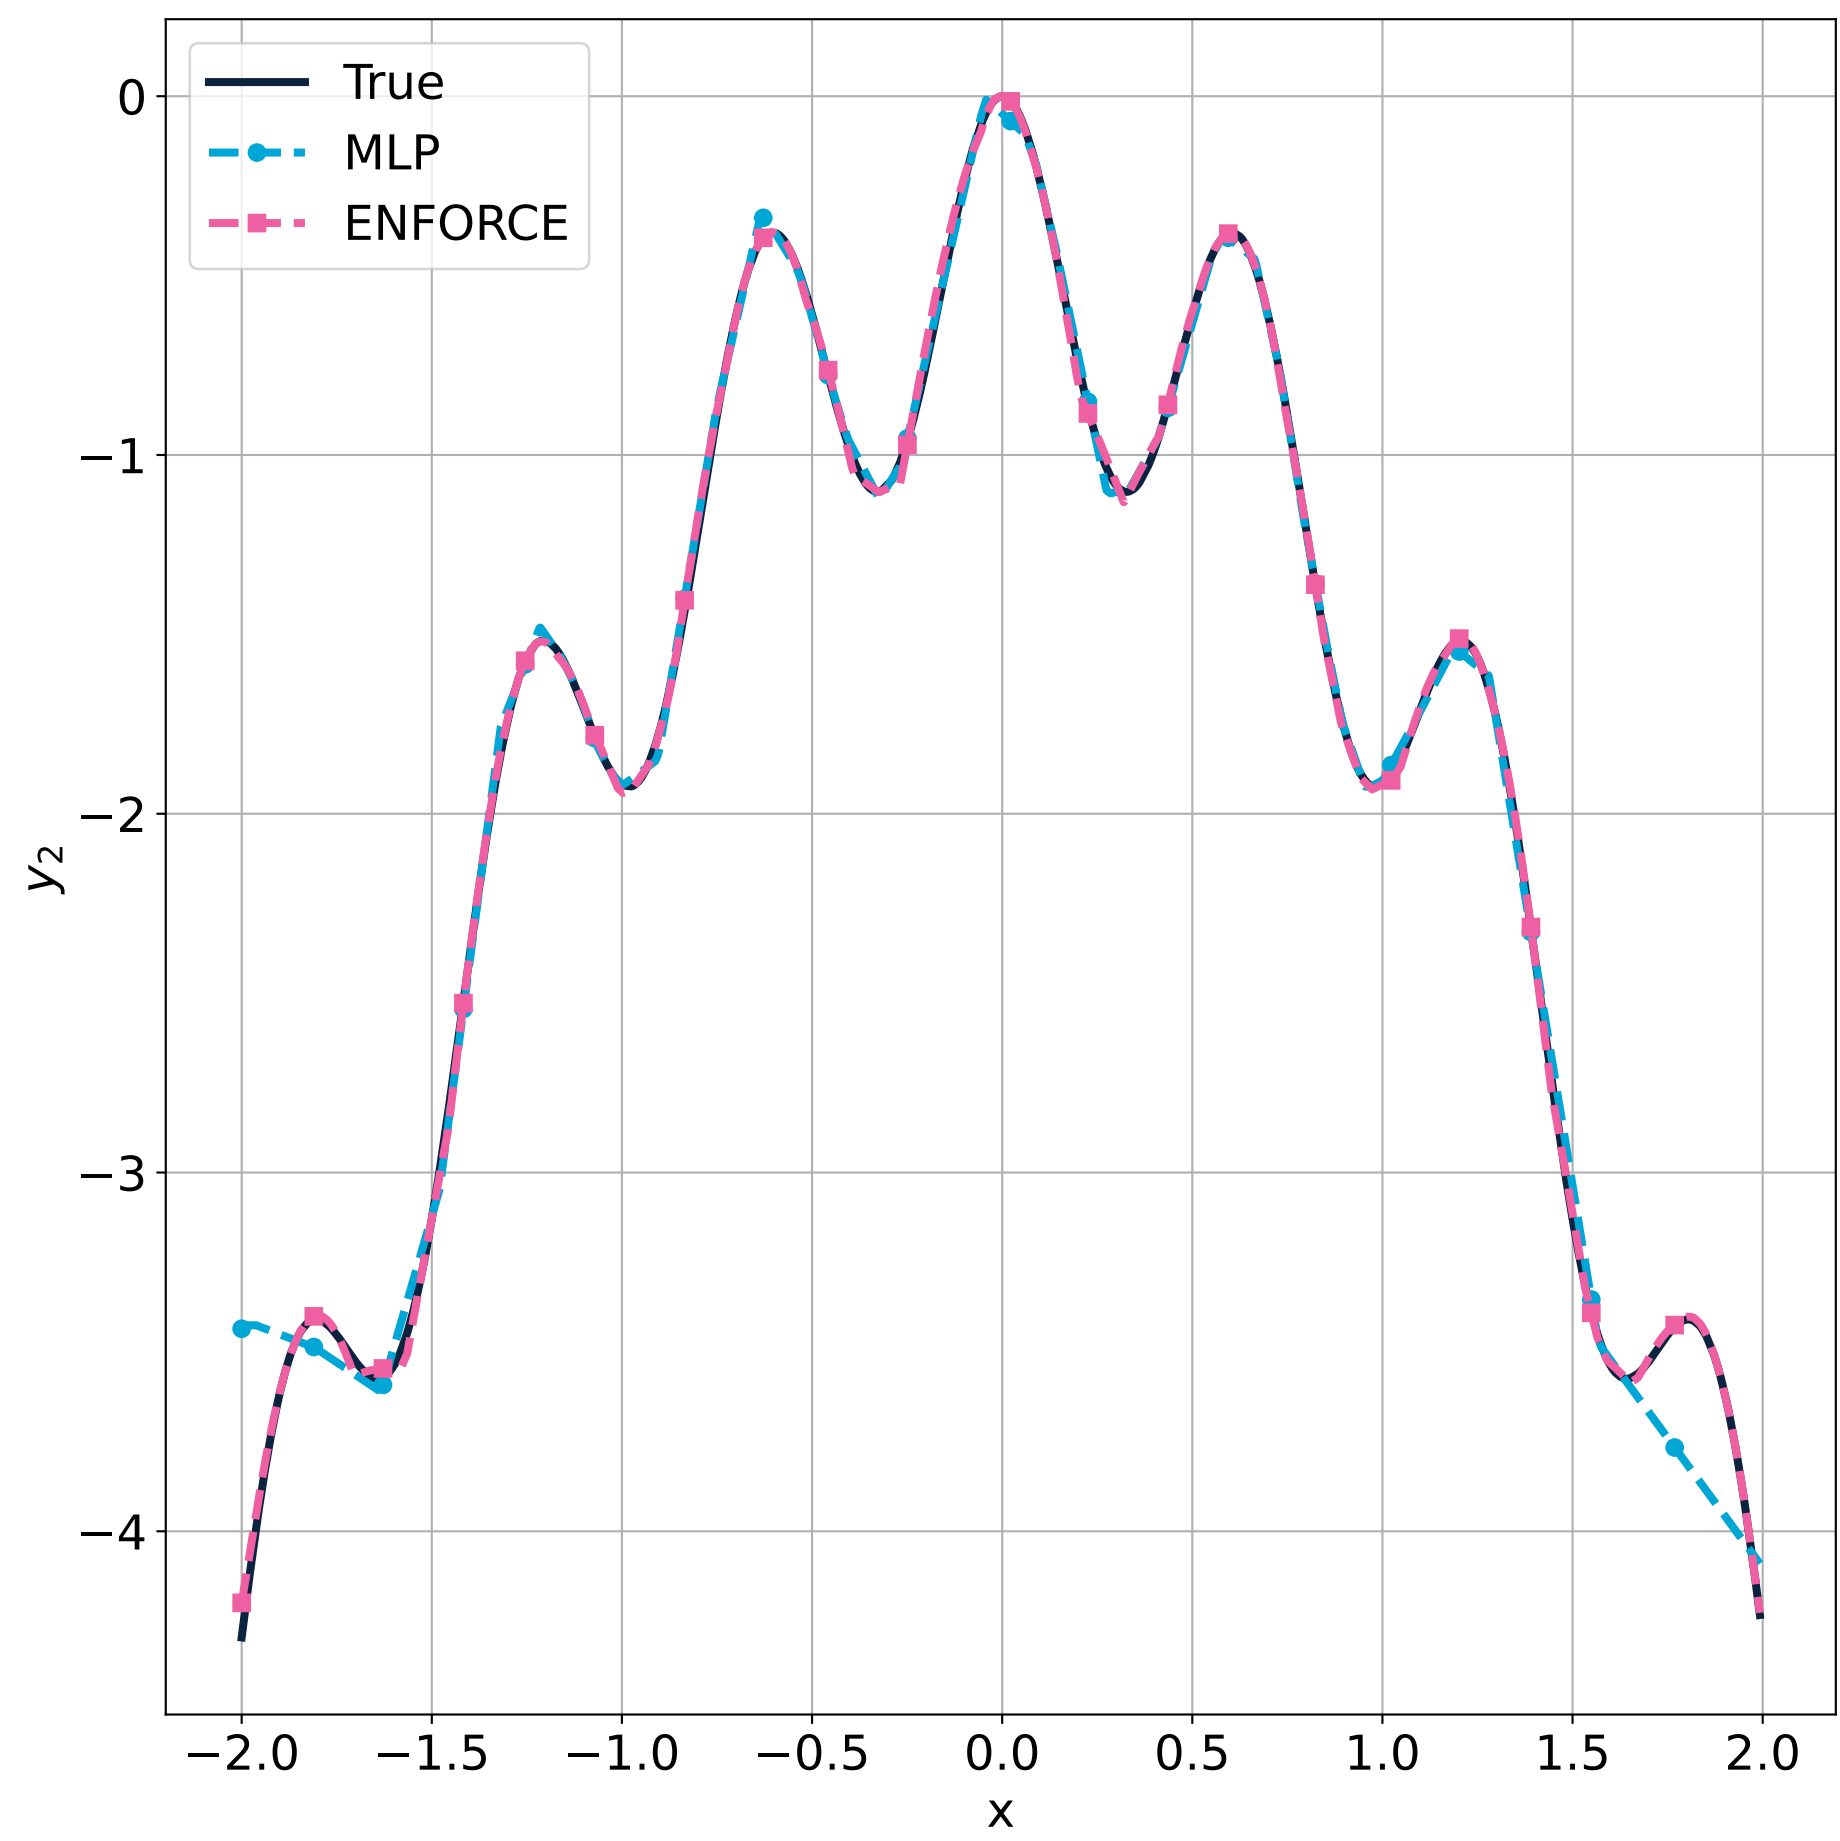

Supplement: supplementary_material [file y2_vs_x_improved.pdf › ENFORCE_SupplementalMaterial_ICLR/ENFORCE_SupplementalMaterial/ENFORCE/reports/figures/y2_vs_x_improved.pdf]
